# Supplementary material for: Effect of Soft Viscoelastic Biopolymer on the Undrained Shear Behavior of Loose Sands
Source: Atypon-hosted journal article supplement (doi:10.1061/(asce)gt.1943-5606.0002582), 2021-06-03
Supplement: supplemental materials_gt.1943-5606.0002582_noh.pdf [file supplemental%20materials_gt.1943-5606.0002582_noh.pdf]

## SUPPLEMENTAL MATERIALS

*ASCE Journal of Geotechnical and Geoenvironmental Engineering*

# Effect of Soft Viscoelastic Biopolymer on the Undrained Shear Behavior of Loose Sands

Dong-Hwa Noh, Wonjun Cha, J. Carlos Santamarina,  
Gye-Chun Cho, and Tae-Hyuk Kwon

**DOI:** 10.1061/(ASCE)GT.1943-5606.0002582

© ASCE 2021

[www.ascelibrary.org](http://www.ascelibrary.org)

## Contents

|                  |                                                                                                                                                                                                                                                                                                                                                                                                                                                                           | Page      |
|------------------|---------------------------------------------------------------------------------------------------------------------------------------------------------------------------------------------------------------------------------------------------------------------------------------------------------------------------------------------------------------------------------------------------------------------------------------------------------------------------|-----------|
| <b>Table S1</b>  | Gelatin solution composition                                                                                                                                                                                                                                                                                                                                                                                                                                              | <b>S2</b> |
| <b>Figure S1</b> | Large-strain mechanical properties of pure gelatin samples at different gelatin concentrations. (a) Stress-strain trends measured in uniaxial compression tests. (b) Uniaxial compressive strength. (c) Young's modulus $E$ determined at half of the peak strain.                                                                                                                                                                                                        | <b>S3</b> |
| <b>Figure S2</b> | Resonant mode excitation of pure gelatin under a fixed-free condition. (a) Test setup. (b) Representative data acquired from the longitudinal mode (gelatin concentration $C = 16\%$ ).                                                                                                                                                                                                                                                                                   | <b>S4</b> |
| <b>Figure S3</b> | Small-strain mechanical properties of pure gelatin samples obtained from the resonant mode testing. (a) Longitudinal wave velocity $V_L$ and shear wave velocity $V_S$ . (b) Young's modulus $E$ and shear modulus $G$ . (c) Longitudinal damping coefficient $c_L$ and shear damping coefficient $c_S$ .                                                                                                                                                                 | <b>S5</b> |
| <b>Figure S4</b> | Biopolymer-free sand. Cascade of shear wave signature during undrained deviator loading: (a) $D_r = 42\%$ at $\sigma'_o = 100$ kPa, (b) $D_r = 53\%$ at $\sigma'_o = 100$ kPa, (c) $D_r = 40\%$ at $\sigma'_o = 400$ kPa, (d) $D_r = 45\%$ at $\sigma'_o = 400$ kPa, and (e) $D_r = 61\%$ at $\sigma'_o = 400$ kPa.                                                                                                                                                       | <b>S6</b> |
| <b>Figure S5</b> | Sand with biopolymer "consolidated-before-gelation" <i>CbG</i> . Cascade of shear wave signature during undrained deviator loading: (a) $C = 8\%$ at $\sigma'_o = 100$ kPa, (b) $C = 12\%$ at $\sigma'_o = 100$ kPa, (c) $C = 16\%$ at $\sigma'_o = 100$ kPa, (d) $C = 20\%$ at $\sigma'_o = 100$ kPa, (e) $C = 8\%$ at $\sigma'_o = 400$ kPa, (f) $C = 12\%$ at $\sigma'_o = 400$ kPa, (g) $C = 16\%$ at $\sigma'_o = 400$ kPa, (h) $C = 20\%$ at $\sigma'_o = 400$ kPa. | <b>S7</b> |
| <b>Figure S6</b> | Sand with biopolymer "confined-after-gelation" <i>CaG</i> . Cascade of shear wave signature during undrained deviator loading: (a) $C = 8\%$ at $\sigma_o = 50$ kPa, (b) $C = 12\%$ at $\sigma_o = 50$ kPa, (c) $C = 16\%$ at $\sigma_o = 50$ kPa, (d) $C = 20\%$ at $\sigma_o = 50$ kPa, (e) $C = 8\%$ at $\sigma_o = 100$ kPa, (f) $C = 12\%$ at $\sigma_o = 100$ kPa, (g) $C = 16\%$ at $\sigma_o = 100$ kPa, (h) $C = 20\%$ at $\sigma_o = 100$ kPa.                  | <b>S8</b> |
| <b>Figure S7</b> | Shear wave velocity-mean effective stress relation of the biopolymer-free sand.                                                                                                                                                                                                                                                                                                                                                                                           | <b>S9</b> |

Table S1 Gelatin solution composition

| Concentration [%] | Mass of gelatin [g] | Mass of deionized water [g] |
|-------------------|---------------------|-----------------------------|
| 8                 | 8.70                | 100                         |
| 12                | 13.64               | 100                         |
| 16                | 19.05               | 100                         |
| 20                | 25.00               | 100                         |

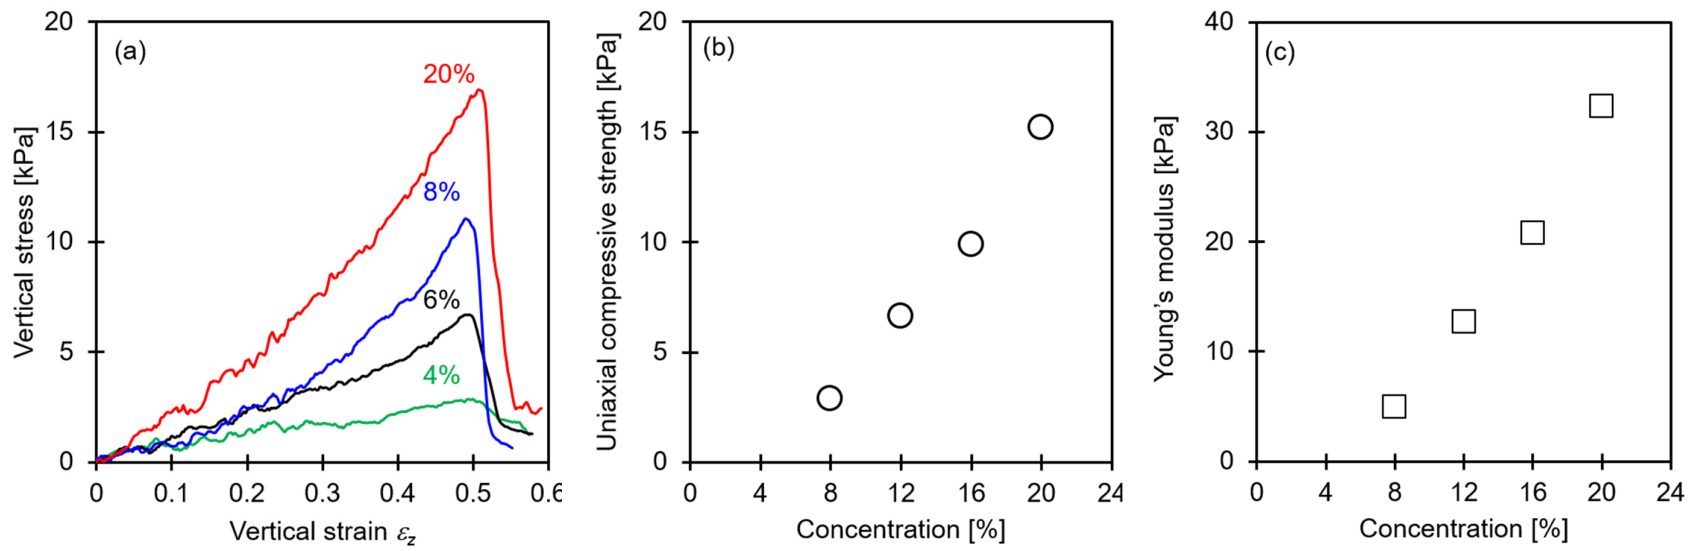

Figure S1. Large-strain mechanical properties of pure gelatin samples at different gelatin concentrations. (a) Stress-strain trends measured in uniaxial compression tests. (b) Uniaxial compressive strength. (c) Young's modulus  $E$  determined at half of the peak strain.

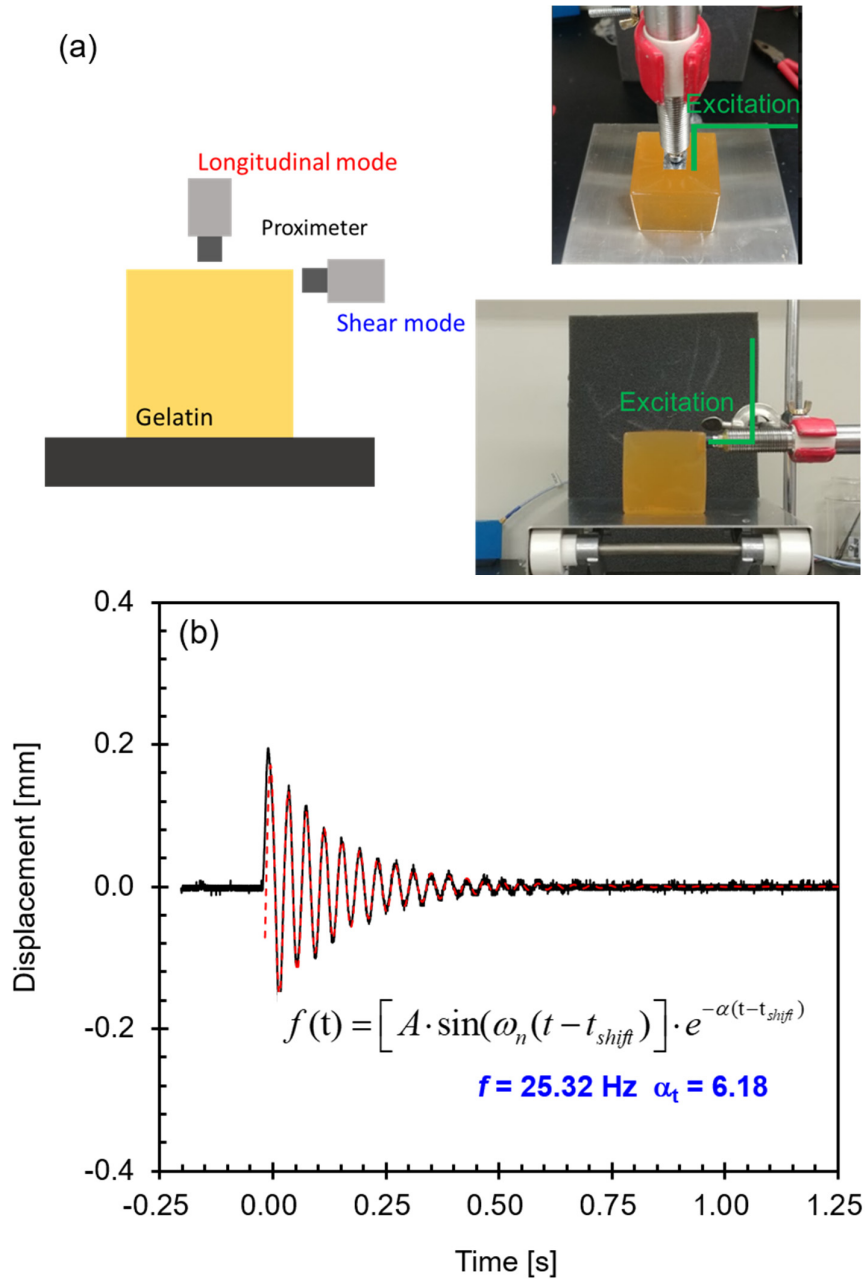

Figure S2. Resonant mode excitation of pure gelatin under a fixed-free condition. (a) Test setup. (b) Representative data acquired from the longitudinal mode (gelatin concentration  $c = 16\%$ ).

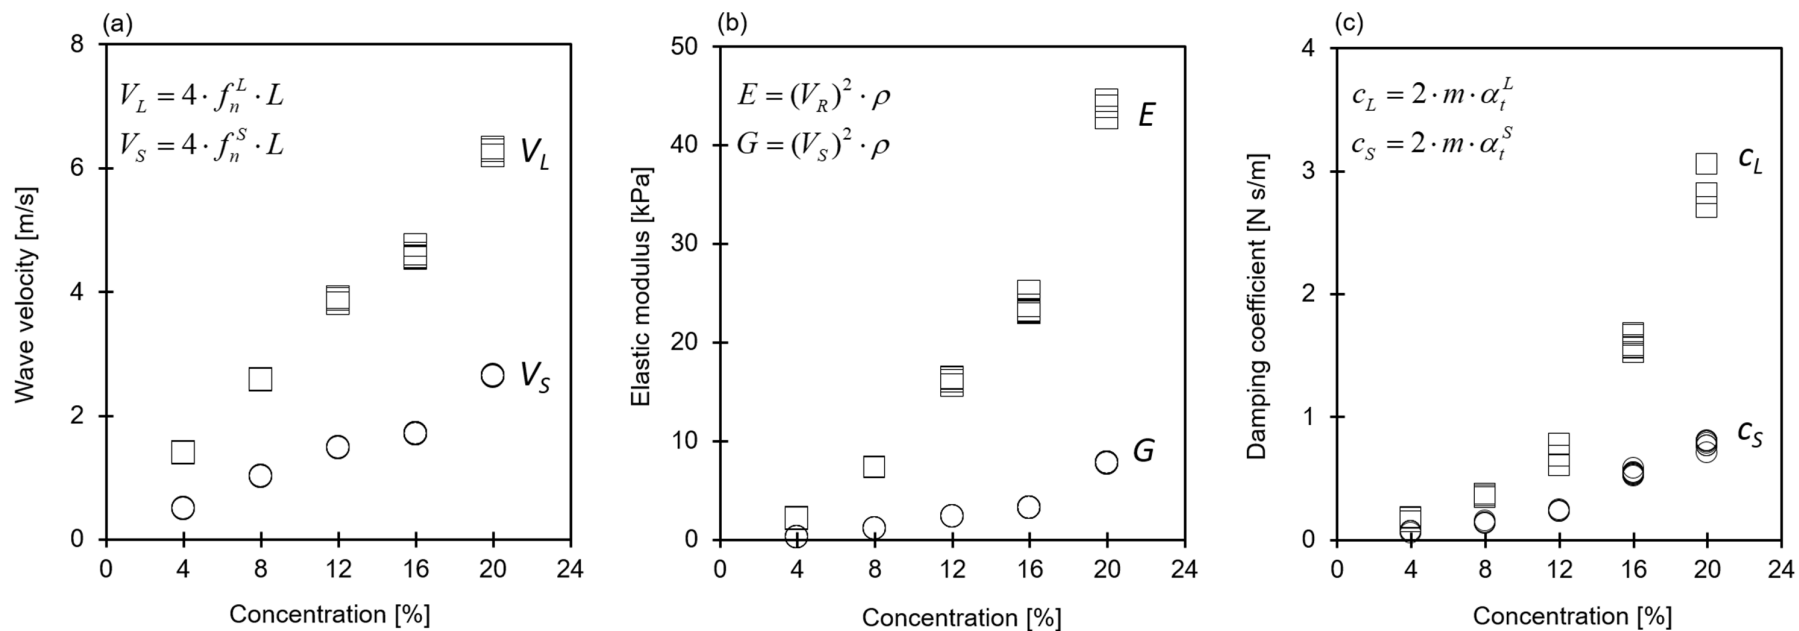

Figure S3. Small-strain mechanical properties of pure gelatin samples obtained from the resonant mode testing. (a) Longitudinal wave velocity  $V_L$  and shear wave velocity  $V_S$ . (b) Young's modulus  $E$  and shear modulus  $G$ . (c) Longitudinal damping coefficient  $c_L$  and shear damping coefficient  $c_S$ .

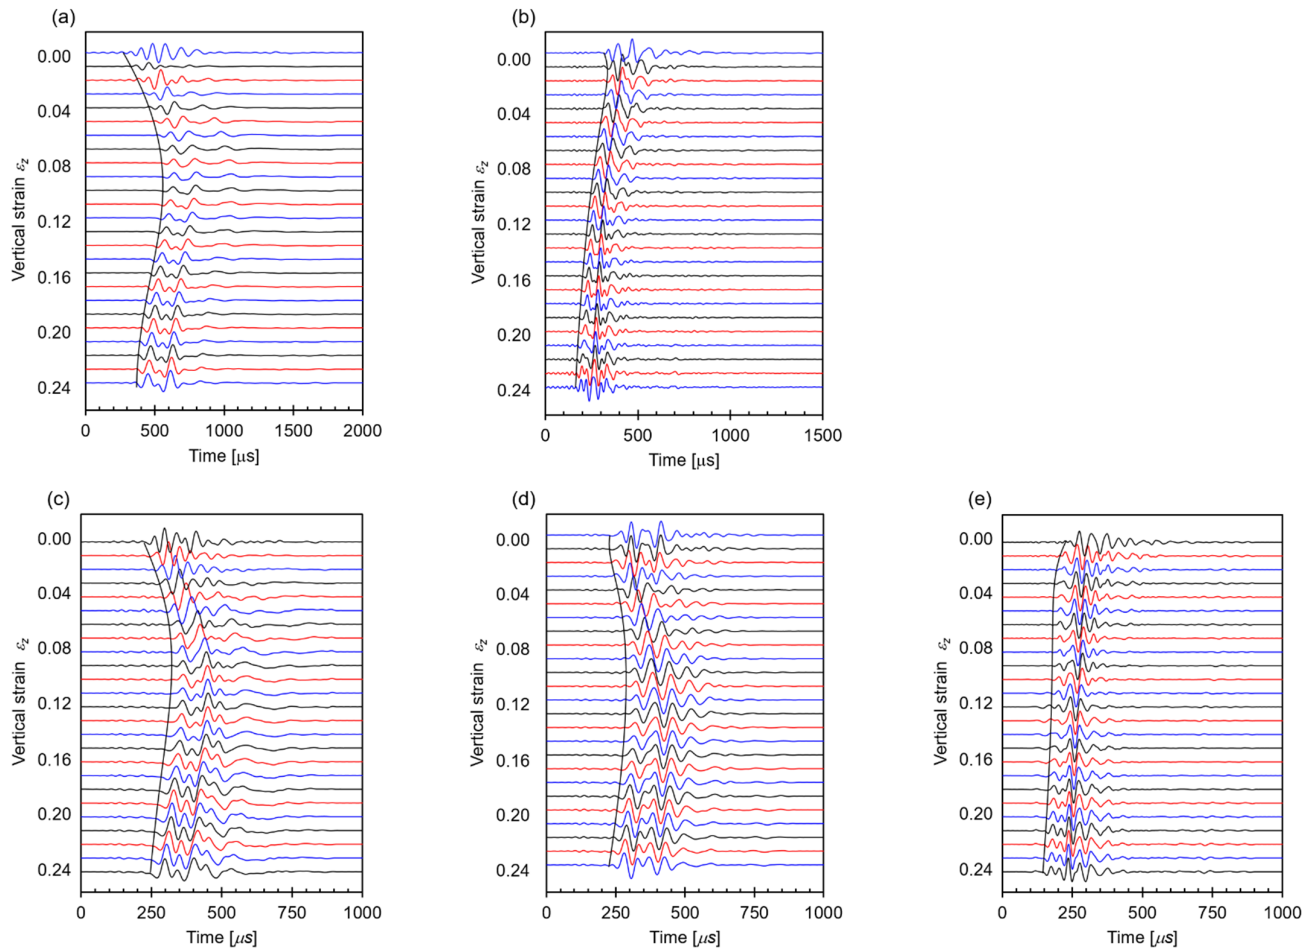

Figure S4. Biopolymer-free sand. Cascade of shear wave signature during undrained deviator loading: (a)  $D_r = 42\%$  at  $\sigma'_o = 100$  kPa, (b)  $D_r = 53\%$  at  $\sigma'_o = 100$  kPa, (c)  $D_r = 40\%$  at  $\sigma'_o = 400$  kPa, (d)  $D_r = 45\%$  at  $\sigma'_o = 400$  kPa, and (e)  $D_r = 61\%$  at  $\sigma'_o = 400$  kPa.

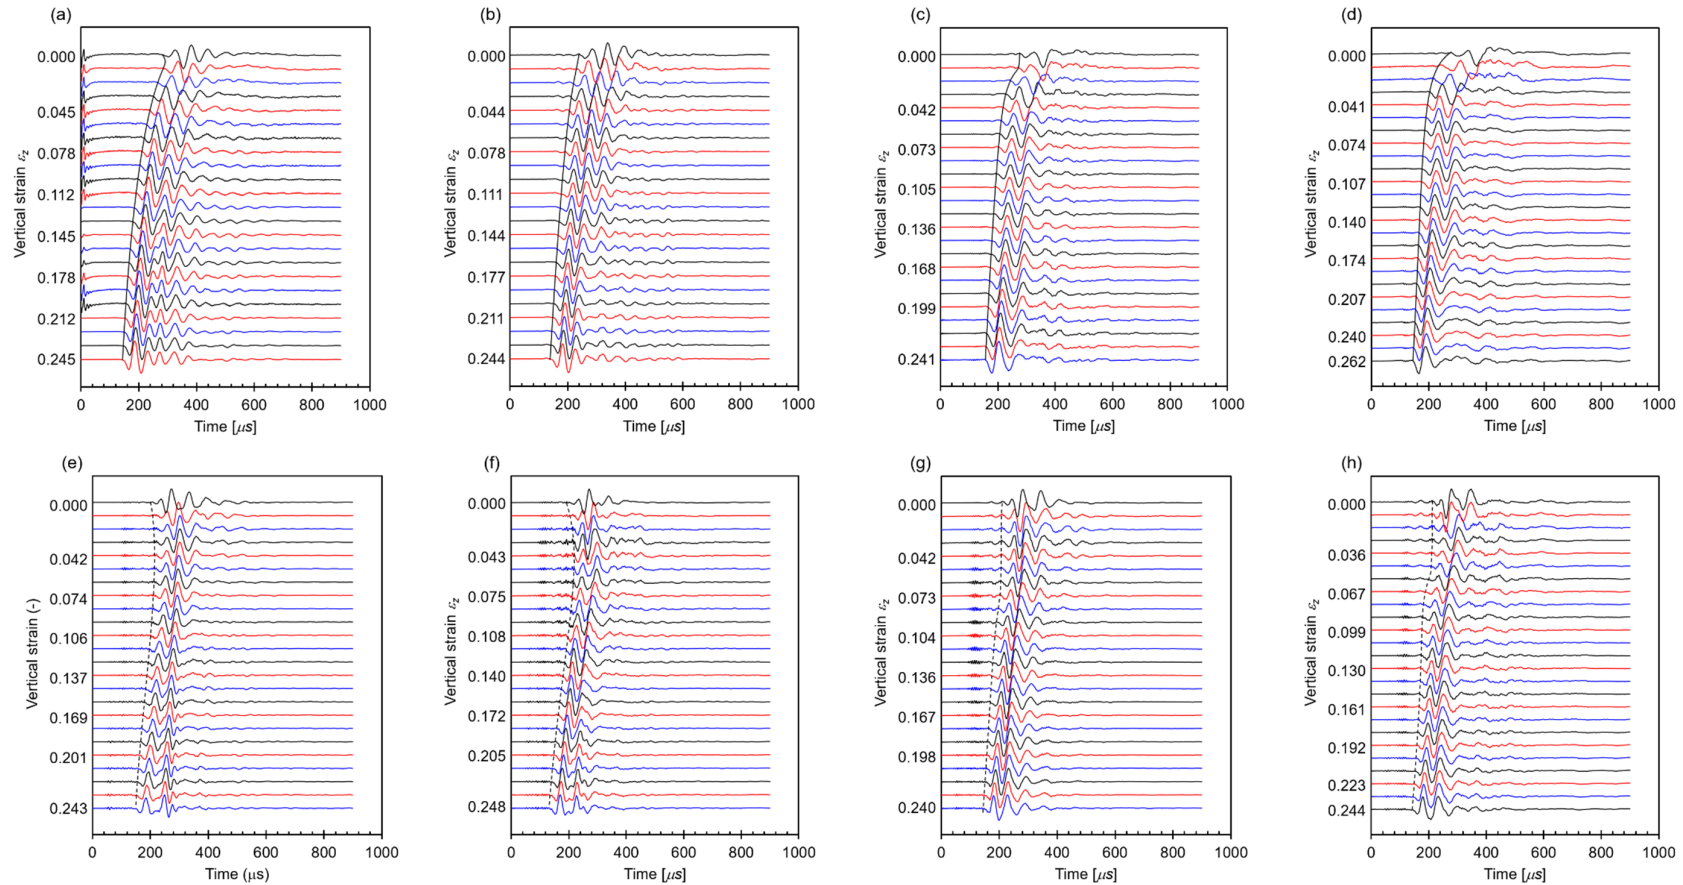

Figure S5. Sand with biopolymer “consolidated-before-gelation” *CbG*. Cascade of shear wave signature during undrained deviator loading: (a)  $C = 8\%$  at  $\sigma'_o = 100$  kPa, (b)  $C = 12\%$  at  $\sigma'_o = 100$  kPa, (c)  $C = 16\%$  at  $\sigma'_o = 100$  kPa, (d)  $C = 20\%$  at  $\sigma'_o = 100$  kPa, (e)  $C = 8\%$  at  $\sigma'_o = 400$  kPa, (f)  $C = 12\%$  at  $\sigma'_o = 400$  kPa, (g)  $C = 16\%$  at  $\sigma'_o = 400$  kPa, (h)  $C = 20\%$  at  $\sigma'_o = 400$  kPa.



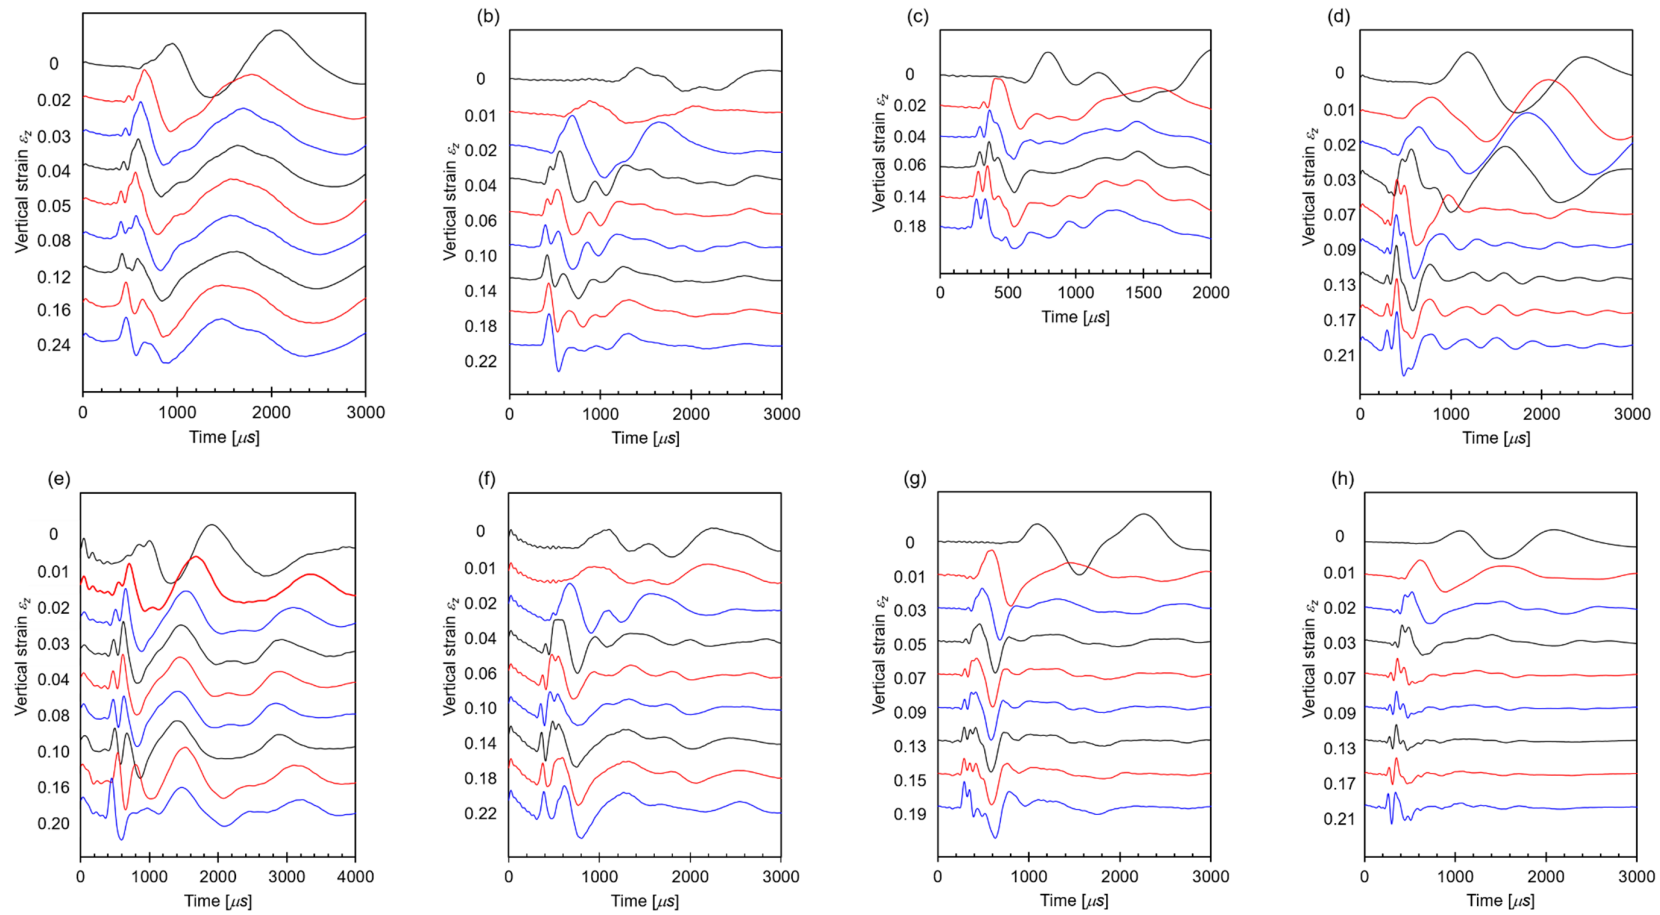

Figure S6. Sand with biopolymer “confined-after-gelation” *CaG*. Cascade of shear wave signature during undrained deviator loading: (a)  $C = 8\%$  at  $\sigma_o = 50$  kPa, (b)  $C = 12\%$  at  $\sigma_o = 50$  kPa, (c)  $C = 16\%$  at  $\sigma_o = 50$  kPa, (d)  $C = 20\%$  at  $\sigma_o = 50$  kPa, (e)  $C = 8\%$  at  $\sigma_o = 100$  kPa, (f)  $C = 12\%$  at  $\sigma_o = 100$  kPa, (g)  $C = 16\%$  at  $\sigma_o = 100$  kPa, (h)  $C = 20\%$  at  $\sigma_o = 100$  kPa.

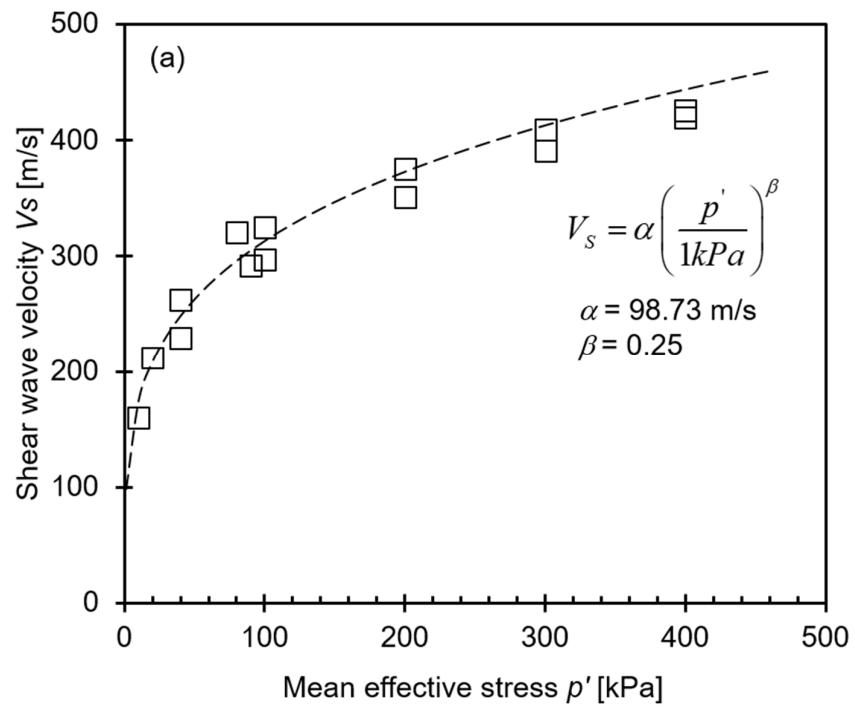

Figure S7. Shear wave velocity-mean effective stress relation of the biopolymer-free sand.
